# Supplementary material for: Blood cell traits’ GWAS loci colocalization with variation in PU.1 genomic occupancy prioritizes causal noncoding regulatory variants
Source: PubMed Central journal article supplement — Cell Genom. 2023 May 17;3(7):100327. doi: 10.1016/j.xgen.2023.100327 (PMC10363807; doi:10.1016/j.xgen.2023.100327), 2023-05-17
Supplement: mmc1.pdf [file mmc1.pdf]

**Cell Genomics, Volume 3**

**Supplemental information**

**Blood cell traits' GWAS loci colocalization with  
variation in PU.1 genomic occupancy prioritizes  
causal noncoding regulatory variants**

**Raehoon Jeong and Martha L. Bulyk**

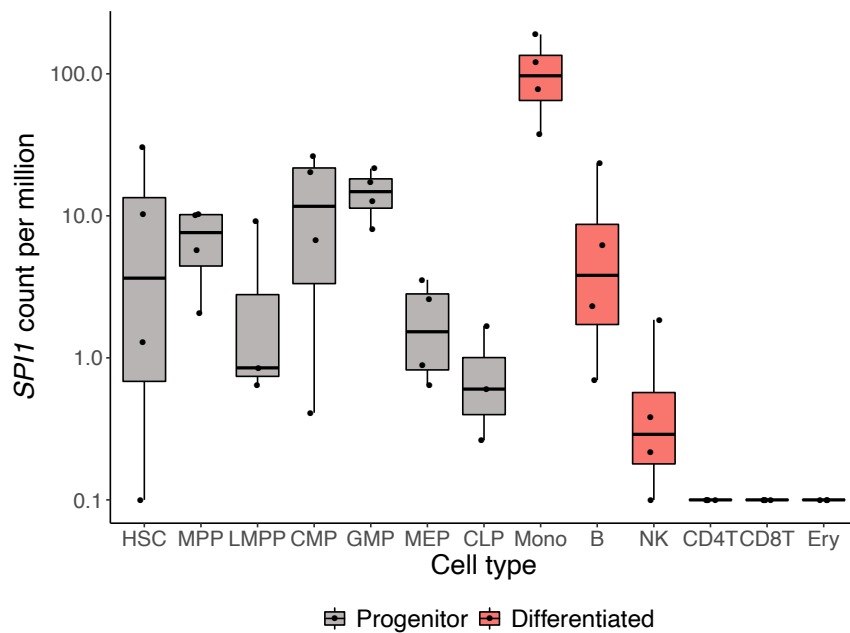

**Figure S1. *SPI1* mRNA expression across blood cell types. Related to Figure 1.**

Expression level is measured by bulk RNA-seq [S1]. The y-axis is log-scaled. Progenitor cell types (gray) and differentiated cell types (red) are colored accordingly. HSC: hematopoietic stem cell, MPP: multipotent progenitor, LMPP: lymphoid-primed multipotent progenitor, GMP: granulocyte-monocyte progenitor, CMP: common myeloid progenitor, MEP: megakaryocyte, CLP: common lymphoid progenitor, B: B cell, NK: natural killer cell, CD4T: CD4<sup>+</sup> T cell, CD8T: CD8<sup>+</sup> T cell, Ery: erythroid.

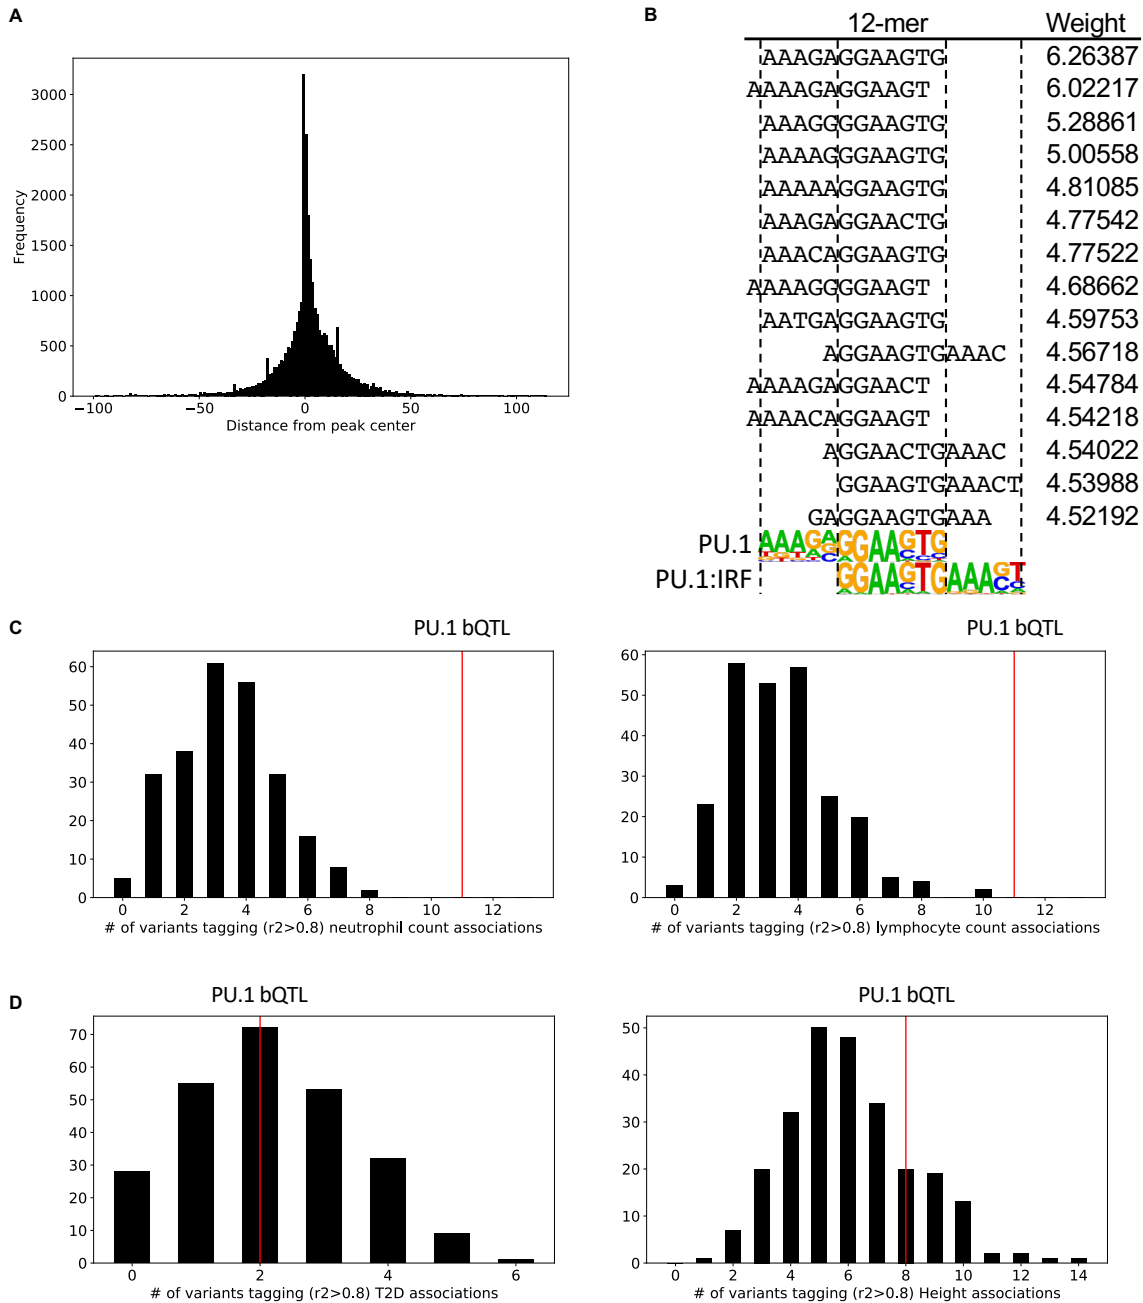

**Figure S2. Properties of PU.1 binding sites and bQTLs. Related to Figures 1 and 2.**

(A) Position of PU.1 motifs at PU.1 binding sites. The bp distance is measured from the center of a 200-bp PU.1 ChIP-seq peak.

(B) 12-mers with the highest (top 15) gkm-SVM weights aligned to PU.1 motif and PU.1:IRF composite motif.

(C and D) A subset of enrichment analysis results corresponding to Figure 2A. The histogram shows the number of variants tagging GWAS associations for each of 250 sets of null variants. The red lines indicate the number of PU.1 bQTL lead variants tagging GWAS associations. (C) Significant enrichment in PU.1 bQTL lead variants tagging (LD  $r^2 > 0.8$ ) neutrophil and lymphocyte count associations. (D) Lack of enrichment in PU.1 bQTL lead variants tagging (LD  $r^2 > 0.8$ ) type 2 diabetes (T2D) [S2] and height [S3] GWAS associations.

**A JLIM X Coloc O**

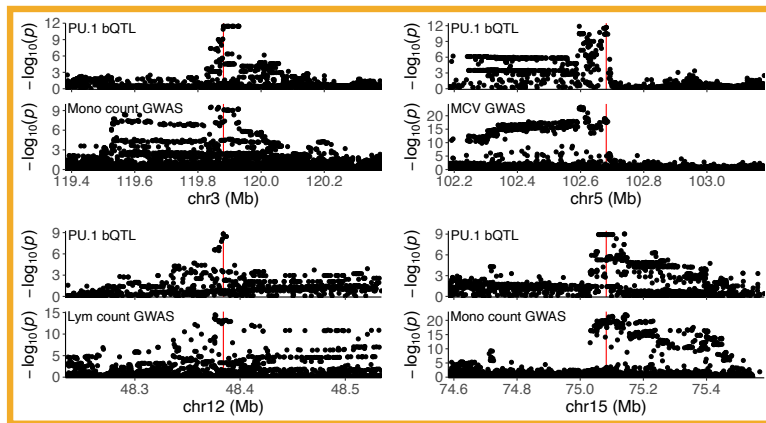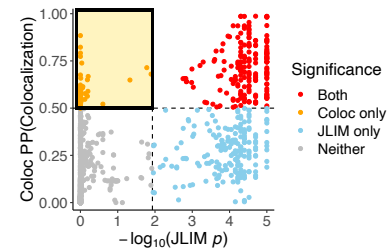

**B JLIM O Coloc X**

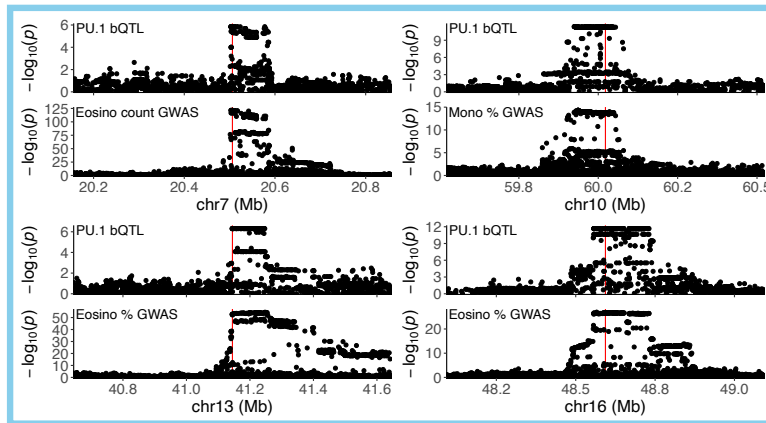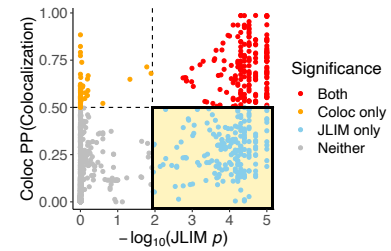

**Figure S3. Examples of discordant colocalization results between JLIM and Coloc. Related to Figure 2.**

(A and B) (Left) Example association plots for PU.1 bQTL and various blood cell traits. (Right) Colocalization results (same as Figure 2B) with yellow shading for the corresponding examples. (A) Loci with significant colocalization based on Coloc, but not JLIM. (B) Loci with significant colocalization based on JLIM, but not Coloc.

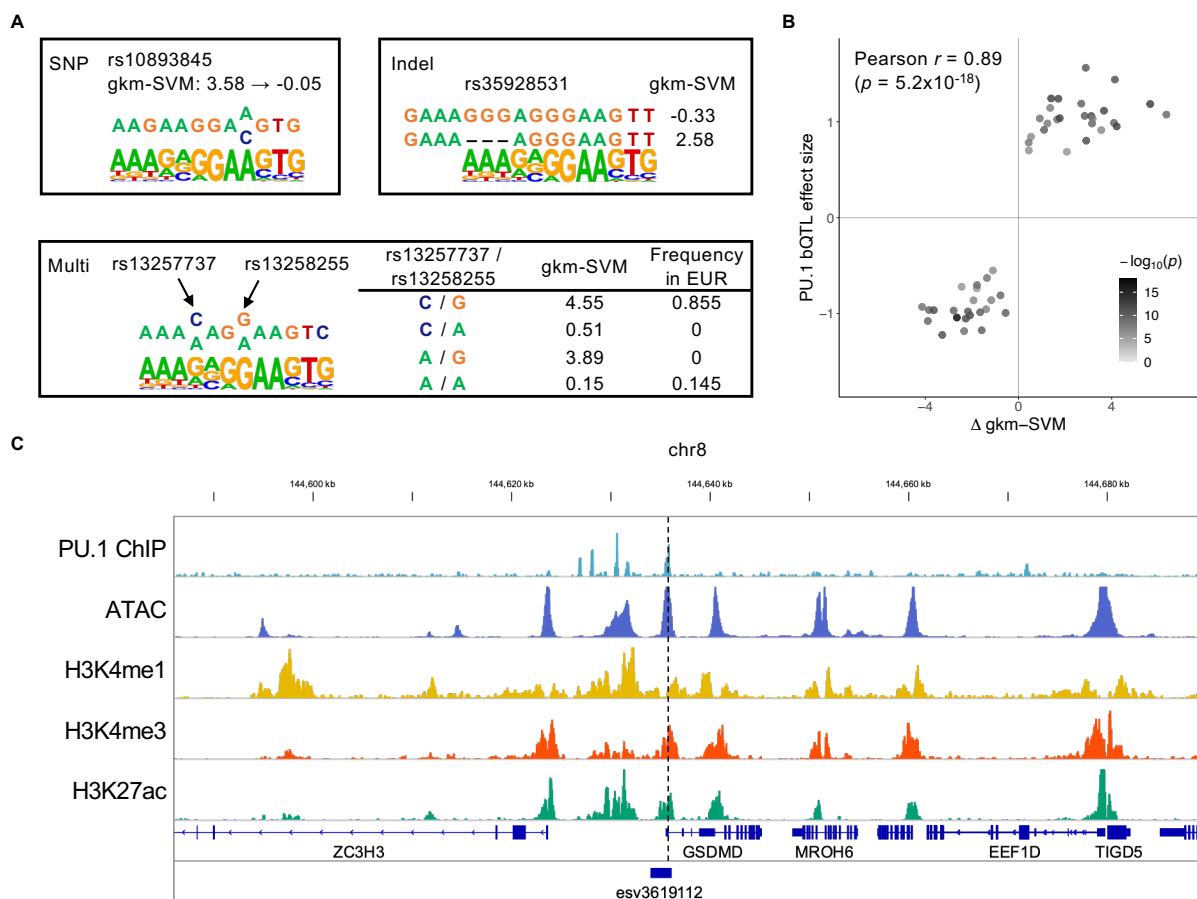

**Figure S4. Examples of variants affecting PU.1 binding. Related to Figure 2.**

(A) Examples of PU.1 motif-altering variants. Categorization of the variants correspond to Figure 2B. At the variant position, the top and bottom bases are reference and variant alleles, respectively. EUR: European ancestry population in the 1000 Genomes Project.

(B) Comparison of changes in motif score ( $\Delta$  gkm-SVM) and estimated bQTL effect sizes of PU.1 motif-altering variants (SNPs and indels) at 49 colocalized loci.

(C) An example of a copy number variation (esv3619112) affecting a PU.1 binding site. The vertical dotted line indicates the location of the affected PU.1 binding site.

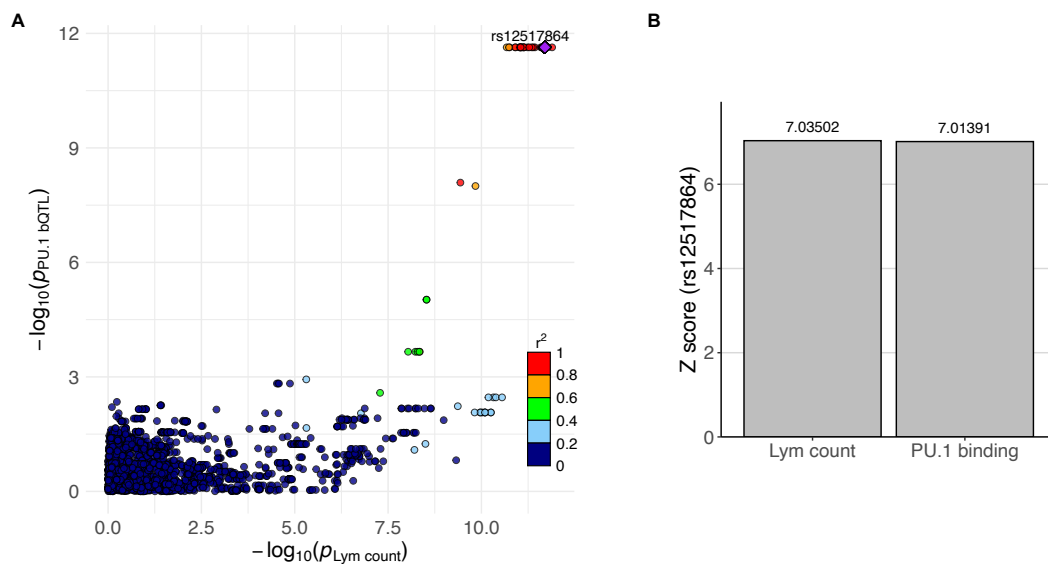

**Figure S5. Colocalization of PU.1 bQTL and lymphocyte count association signals at *ZNF608* locus. Related to Figure 5.**

(A) Merged association plot for PU.1 bQTL and lymphocyte count association signals. Points are colored by LD  $r^2$  with respect to rs12517864, which is labeled with a purple diamond.

(B) Z scores of rs12517864 for lymphocyte count and PU.1 bQTL association.

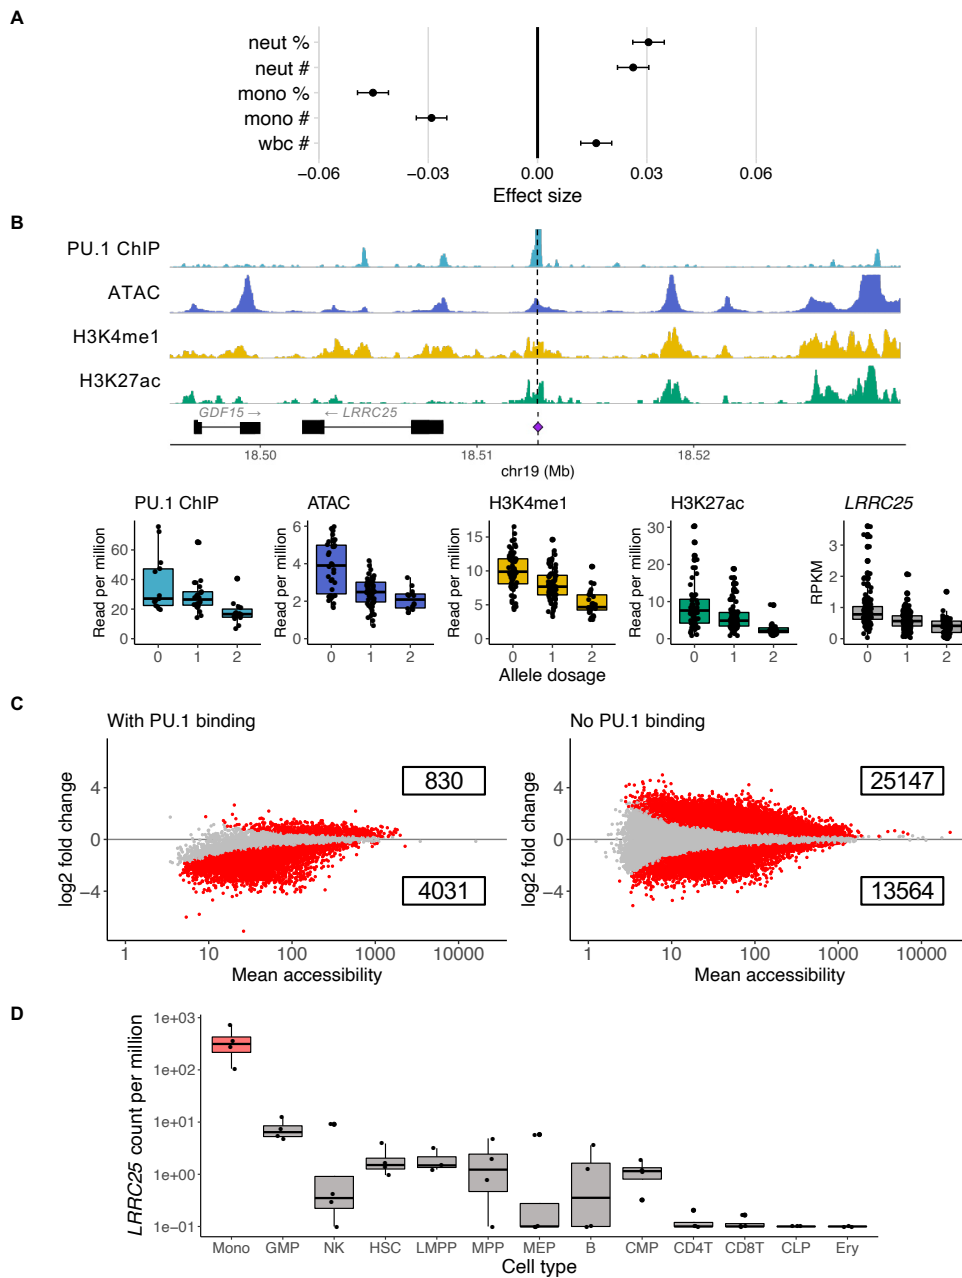

**Figure S6. Effects of PU.1 motif-altering deletion rs5827412. Related to Figure 6.**

(A) GWAS effect size estimates for rs5827412 on 5 blood cell traits. The error bars indicate 95% confidence interval. wbc #: white blood cell count, neut % & #: neutrophil percentage & count, mono % & #: monocyte percentage & count. Abbreviations of blood cell traits are further described in Table S3.

(B) Regulatory QTL effects of rs5827412. (top) Genome tracks show PU.1 ChIP-seq, ATAC-seq, and H3K4me1 and H3K27ac ChIP-seq data from LCLs, respectively. The dotted vertical line and the purple diamond mark the location of rs5827412. (bottom) 4 phenotype values in read per million for each genome track and reads per kilobase million for *LRRC25* expression levels. Allele dosage corresponds to that of the deletion allele. On top of the box plots, all the data points are shown.

(C) PU.1-dependent loss of chromatin accessibility. Log<sub>2</sub> fold change in chromatin accessibility in *SP11*, the gene encoding PU.1, knock-out RS4;11 cell line for regions with PU.1 occupancy measured by ChIP-seq (left) and those without (right). Red points are accessible regions with significant gain or loss ( $p_{\text{adj}} < 0.05$ ) of accessibility in knock-out mutants. Numbers in boxes represent the number of differentially accessible regions that show increase or decrease, respectively, in accessibility in *SP11* knock-outs.

(D) *LRRC25* mRNA expression level across 13 blood cell types. Monocyte is colored red, and the rest are colored in gray. The y-axis is log-scaled. Cell types are abbreviated as in Figure S1.

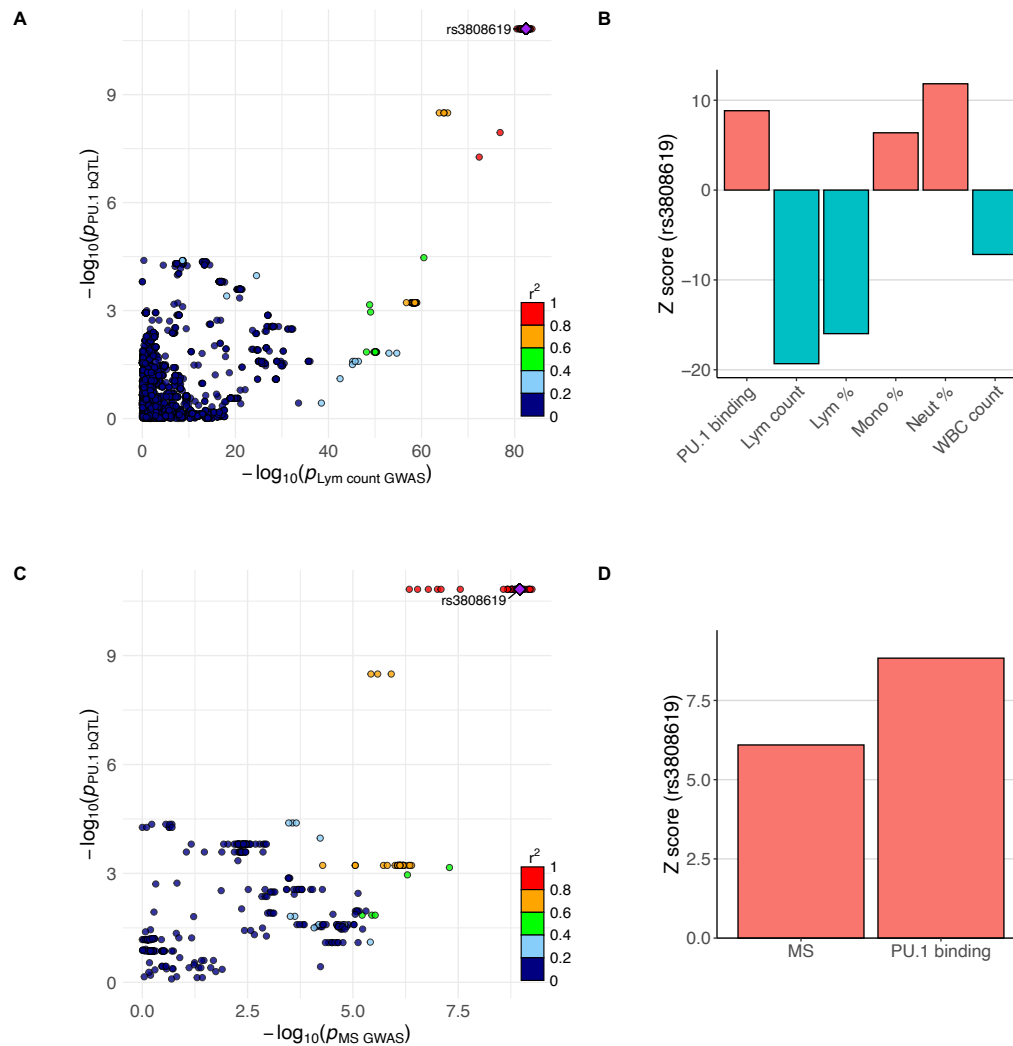

**Figure S7. Colocalization of PU.1 bQTL and multiple sclerosis association signals at *ZC2HC1A* locus. Related to Figure 7.**

- (A) Merged association plot for PU.1 bQTL and lymphocyte count association signals. Points are colored by LD  $r^2$  in the 1000 Genomes Project European population, with respect to rs3808619, which is labeled with a purple diamond.
- (B) Z scores of rs3808619 for PU.1 bQTL and 5 blood cell traits association.
- (C) Merged association plot for PU.1 bQTL and multiple sclerosis (MS) association signals [S4]. Points are labeled and colored as in (A).
- (D) Z scores of rs3808619 for MS and PU.1 bQTL association.



**Table S1. Summary of PU.1 ChIP-seq data. Related to Figure 1.**

CEU: Utah residents (CEPH) with Northern and Western European ancestry

| Sample  | Ancestry | Sex    | Number of mapped and filtered reads | Reference                       | EMBL-EBI ArrayExpress Accession |
|---------|----------|--------|-------------------------------------|---------------------------------|---------------------------------|
| NA06985 | CEU      | Female | 33654054                            | Waszak et al. [S5]<br>(n = 45)  | E-MTAB-3657                     |
| NA06986 | CEU      | Male   | 24382793                            |                                 |                                 |
| NA06994 | CEU      | Male   | 25705372                            |                                 |                                 |
| NA07037 | CEU      | Female | 28128352                            |                                 |                                 |
| NA07048 | CEU      | Male   | 22419180                            |                                 |                                 |
| NA07051 | CEU      | Male   | 14588459                            |                                 |                                 |
| NA07056 | CEU      | Female | 27771303                            |                                 |                                 |
| NA07357 | CEU      | Male   | 20551802                            |                                 |                                 |
| NA10847 | CEU      | Female | 25676020                            |                                 |                                 |
| NA10851 | CEU      | Male   | 28145921                            |                                 |                                 |
| NA11829 | CEU      | Male   | 25063350                            |                                 |                                 |
| NA11830 | CEU      | Female | 5188895                             |                                 |                                 |
| NA11831 | CEU      | Male   | 21836117                            |                                 |                                 |
| NA11832 | CEU      | Female | 31885381                            |                                 |                                 |
| NA11840 | CEU      | Female | 24872788                            |                                 |                                 |
| NA11881 | CEU      | Male   | 13183993                            |                                 |                                 |
| NA11894 | CEU      | Female | 32952045                            |                                 |                                 |
| NA11918 | CEU      | Female | 28771879                            |                                 |                                 |
| NA11920 | CEU      | Female | 56161783                            |                                 |                                 |
| NA11931 | CEU      | Female | 30173305                            |                                 |                                 |
| NA11992 | CEU      | Male   | 22578216                            |                                 |                                 |
| NA11994 | CEU      | Male   | 22222710                            |                                 |                                 |
| NA12005 | CEU      | Male   | 29794021                            |                                 |                                 |
| NA12043 | CEU      | Male   | 26253001                            |                                 |                                 |
| NA12154 | CEU      | Male   | 23808118                            |                                 |                                 |
| NA12156 | CEU      | Female | 24555856                            |                                 |                                 |
| NA12234 | CEU      | Female | 27479585                            |                                 |                                 |
| NA12249 | CEU      | Female | 7879613                             |                                 |                                 |
| NA12275 | CEU      | Female | 8835732                             |                                 |                                 |
| NA12282 | CEU      | Male   | 35200108                            |                                 |                                 |
| NA12286 | CEU      | Male   | 39649385                            |                                 |                                 |
| NA12287 | CEU      | Female | 28933471                            |                                 |                                 |
| NA12383 | CEU      | Female | 41835685                            |                                 |                                 |
| NA12489 | CEU      | Female | 23405252                            |                                 |                                 |
| NA12750 | CEU      | Male   | 31094939                            |                                 |                                 |
| NA12760 | CEU      | Male   | 26128031                            |                                 |                                 |
| NA12761 | CEU      | Female | 13982870                            |                                 |                                 |
| NA12762 | CEU      | Male   | 4512149                             |                                 |                                 |
| NA12763 | CEU      | Female | 14502734                            |                                 |                                 |
| NA12776 | CEU      | Female | 33261968                            |                                 |                                 |
| NA12812 | CEU      | Male   | 21479602                            |                                 |                                 |
| NA12813 | CEU      | Female | 12761678                            |                                 |                                 |
| NA12814 | CEU      | Male   | 12867291                            |                                 |                                 |
| NA12815 | CEU      | Female | 24083021                            |                                 |                                 |
| NA12873 | CEU      | Female | 26526926                            |                                 |                                 |
| NA07346 | CEU      | Female | 12677089                            | Kilpinen et al. [S6]<br>(n = 4) | E-MTAB-1884                     |
| NA11993 | CEU      | Female | 36953245                            |                                 |                                 |
| NA12891 | CEU      | Male   | 25834224                            |                                 |                                 |
| NA12892 | CEU      | Female | 26772335                            |                                 |                                 |

**Table S3. Description of blood cell traits. Related to Figure 2.**

This table is adapted from Table S1 of Vuckovic et al. [S7].

| Cell Type         | Abbreviation   | Blood cell trait                                        | Description                                                                                                              |
|-------------------|----------------|---------------------------------------------------------|--------------------------------------------------------------------------------------------------------------------------|
| Granulocyte       | Baso count     | Basophil count                                          | Count of basophils per unit volume of blood                                                                              |
|                   | Baso %         | Basophil percentage of white cells                      | Percentage of white cells that are basophils                                                                             |
|                   | Eosino count   | Eosinophil count                                        | Count of eosinophils per unit volume of blood                                                                            |
|                   | Eosino %       | Eosinophil percentage of white cells                    | Percentage of white cells that are eosinophils                                                                           |
|                   | Neut count     | Neutrophil count                                        | Count of neutrophils per unit volume of blood                                                                            |
|                   | Neut %         | Neutrophil percentage of white cells                    | Percentage of white cells that are neutrophils                                                                           |
|                   | WBC count      | White blood cell count                                  | Aggregate count of white cells per unit volume of blood                                                                  |
| Monocyte          | Mono count     | Monocyte count                                          | Count of monocytes per unit volume of blood                                                                              |
|                   | Mono %         | Monocyte percentage of white cells                      | Percentage of white cells that are monocytes                                                                             |
| Lymphocyte        | Lym count      | Lymphocyte count                                        | Aggregate count of lymphoid cells per unit volume of blood                                                               |
|                   | Lym %          | Lymphocyte percentage of white cells                    | Percentage of white cells that are lymphocytes                                                                           |
| Mature red cell   | Hb conc        | Hemoglobin concentration                                | Concentration of hemoglobin with respect to unit of volume of blood                                                      |
|                   | Ht %           | Hematocrit                                              | Volume fraction of blood occupied by red cells                                                                           |
|                   | MCH            | Mean corpuscular hemoglobin                             | Average mass of hemoglobin per red cell                                                                                  |
|                   | MCV            | Mean corpuscular volume                                 | Mean volume of red blood cells                                                                                           |
|                   | MSCV           | Mean sphered corpuscular volume                         | Mean volume of sphered red cells                                                                                         |
|                   | RBC count      | Red blood cell count                                    | Count of red blood cells per unit volume of blood                                                                        |
|                   | RBC dist width | Red cell distribution width                             | Coefficient of variation of red cell volume distribution                                                                 |
| Immature red cell | HLSR count     | High light scatter reticulocyte count                   | Count of high RNA content (immature) reticulocytes per unit volume of blood                                              |
|                   | HLSR %         | High light scatter reticulocyte percentage of red cells | Immature reticulocyte count as a percentage of red blood cell count                                                      |
|                   | Imm ret frac   | Immature fraction of reticulocytes                      | Fraction of reticulocytes with high RNA content, as measured by light scatter                                            |
|                   | MRV            | Mean reticulocyte volume                                | Mean volume of reticulocyte cells                                                                                        |
|                   | Ret count      | Reticulocyte count                                      | Count of reticulocytes per unit volume of blood                                                                          |
|                   | Ret %          | Reticulocyte fraction of red cells                      | Percentage of red blood cells that are reticulocytes                                                                     |
| Platelet          | MPV            | Mean platelet volume                                    | Mean volume of platelets                                                                                                 |
|                   | Plt count      | Platelet count                                          | Count of platelets per unit volume of blood                                                                              |
|                   | Plt crit       | Plateletcrit                                            | Volume fraction of blood occupied by platelets                                                                           |
|                   | Plt dist width | Platelet distribution width                             | The spread of the platelet volume distribution. Note that Sysmex and Coulter use different statistics to measure spread. |

**Note S1. Note about discordant results from JLIM and Coloc. Related to Figure 2.**

Although we didn't aim to rigorously investigate the differences between JLIM [S9] and Coloc [S10], we looked through the examples where the two methods showed discordant results (Figures 2B and S3). First, we visually inspected the association plots for some of the loci, where only Coloc showed significant colocalization. Here, we could not clearly determine whether they are false positives by Coloc or false negatives by JLIM (Figure S3A). It is possible that the LD structure is different enough between the GWAS cohort and the PU.1 bQTL samples to cause JLIM to fail to reject the null hypothesis. On the other hand, loci that only JLIM showed colocalization often had a large set of variants in LD (Figure S3B). This trend is likely due to JLIM's model specification, where the JLIM statistics is higher if the lead variants for the two traits show high LD [S9], even if the LD block includes more variants. In sum, some of the loci with discordant results can be false negatives, but we decided to focus on loci with significant colocalization from both methods.

**Note S2. Note about the two blood cell traits GWAS data. Related to Figure 6.**

We utilized two blood cell traits GWAS data for this work. They are both statistics for the UK Biobank data with notable differences. Canela-Xandri and colleagues analyzed data for 452,264 White British individuals [S8], whereas Vuckovic and colleagues analyzed those from 408,112 individuals of British ancestry [S7]. They both applied linear mixed models. We incorporated Canela-Xandri et al. data for colocalization analyses because we expected greater statistical power due to larger sample sizes. However, Canela-Xandri and colleagues imputed the genotypes using the Haplotype Reference Consortium panel, which only includes SNPs and not indels, leading to SNP-only data. On the other hand, Vuckovic and colleagues imputed the genotypes using 1000 Genomes Project Phase 3 [S11] and UK10K [S12] panel, which includes SNPs and short indels. Therefore, we used Vuckovic et al. data for plotting Figure 6, where a short deletion alters the PU.1 motif, and for determining credible set sizes based on their fine-mapping results.

**Note S3. Note about lymphocyte count association at *ZC2HC1A* locus. Related to Figure 7.**

We pinpointed the PU.1 motif-altering SNP rs3808619 as the likely regulatory variant for colocalized PU.1 bQTL and lymphocyte count association at *ZC2HC1A* locus. Since the variant affects a PU.1 motif at its binding site at *ZC2HC1A* promoter, and the variant is significantly associated with increased *ZC2HC1A* expression, we hypothesized that the direct consequence of the variant is *ZC2HC1A* upregulation. As *ZC2HC1A* has no known function yet, we investigated this locus further. *IL7* gene is located downstream of *ZC2HC1A*, and a multi-ancestry blood cell trait GWAS study [S13] demonstrated that a South Asian ancestry-specific missense mutation (rs2014122253) in *IL7* that increased IL-7 protein secretion in a heterologous cellular system was associated with increased lymphocyte count. rs2014122253 is extremely rare in the European population, so it is not in LD with rs3808619. Interestingly, in eQTLGen data, rs3808619 was significantly, but relatively weakly, associated ( $p=9.45 \times 10^{-14}$ ) with lower *IL7* expression [S14] (this is compared to  $p=3.27 \times 10^{-310}$  for *ZC2HC1A*). Although our analysis with GEUVADIS European LCL samples [S15] didn't show significant association ( $p > 0.1$ ), eQTL Catalogue data [S16] showed that rs3808619 is significantly associated with lower *IL7* expression in multi-ancestry GEUVADIS LCL eQTL analysis [S15] ( $p = 2.85 \times 10^{-9}$ ) and TwinsUK LCL eQTL analysis [S17] ( $p=2.32 \times 10^{-10}$ ); only the latter analysis showed rs3808619 within the credible set of 41 variants. As Chen and colleagues showed that increased IL-7 secretion is associated with increased lymphocyte count [S13], rs3808619's association with lower *IL7* expression and lower lymphocyte count is plausible. How rs3808619 increases regulatory activity by increasing affinity to PU.1 binding leading to increased *ZC2HC1A* expression potentially lowers *IL7* expression is yet unresolved.

## Supplemental Information Reference

- [S1] Corces, M.R., Buenrostro, J.D., Wu, B., Greenside, P.G., Chan, S.M., Koenig, J.L., Snyder, M.P., Pritchard, J.K., Kundaje, A., Greenleaf, W.J., et al. (2016). Lineage-specific and single-cell chromatin accessibility charts human hematopoiesis and leukemia evolution. *Nat Genet* 48, 1193–1203. <https://doi.org/10.1038/ng.3646>
- [S2] Mahajan, A., Taliun, D., Thurner, M., Robertson, N.R., Torres, J.M., Rayner, N.W., Payne, A.J., Steinthorsdottir, V., Scott, R.A., Grarup, N., et al. (2018). Fine-mapping type 2 diabetes loci to single-variant resolution using high-density imputation and islet-specific epigenome maps. *Nat Genet* 50, 1505–1513. <https://doi.org/10.1038/s41588-018-0241-6>
- [S3] Wood, A.R., Esko, T., Yang, J., Vedantam, S., Pers, T.H., Gustafsson, S., Chu, A.Y., Estrada, K., Luan, J., Kutalik, Z., et al. (2014). Defining the role of common variation in the genomic and biological architecture of adult human height. *Nat Genet* 46, 1173–1186. <https://doi.org/10.1038/ng.3097>
- [S4] International Multiple Sclerosis Genetics Consortium (IMSGC), Beecham, A.H., Patsopoulos, N.A., Xifara, D.K., Davis, M.F., Kempainen, A., Cotsapas, C., Shah, T.S., Spencer, C., Booth, D., et al. (2013). Analysis of immune-related loci identifies 48 new susceptibility variants for multiple sclerosis. *Nat Genet* 45, 1353–1360. <https://doi.org/10.1038/ng.2770>
- [S5] Waszak, S.M., Delaneau, O., Gschwind, A.R., Kilpinen, H., Raghav, S.K., Witwicki, R.M., Orioli, A., Wiederkehr, M., Panousis, N.I., Yurovsky, A., et al. (2015). Population Variation and Genetic Control of Modular Chromatin Architecture in Humans. *Cell* 162, 1039–1050. <https://doi.org/10.1016/j.cell.2015.08.001>
- [S6] Kilpinen, H., Waszak, S.M., Gschwind, A.R., Raghav, S.K., Witwicki, R.M., Orioli, A., Migliavacca, E., Wiederkehr, M., Gutierrez-Arcelus, M., Panousis, N.I., et al. (2013). Coordinated effects of sequence variation on DNA binding, chromatin structure, and transcription. *Science* 342, 744–747. <https://doi.org/10.1126/science.1242463>
- [S7] Vuckovic, D., Bao, E.L., Akbari, P., Lareau, C.A., Mousas, A., Jiang, T., Chen, M.-H., Raffield, L.M., Tardaguila, M., Huffman, J.E., et al. (2020). The Polygenic and Monogenic Basis of Blood Traits and Diseases. *Cell* 182, 1214–1231.e11. <https://doi.org/10.1016/j.cell.2020.08.008>
- [S8] Canela-Xandri, O., Rawlik, K., and Tenesa, A. (2018). An atlas of genetic associations in UK Biobank. *Nat Genet* 50, 1593–1599. <https://doi.org/10.1038/s41588-018-0248-z>
- [S9] Chun, S., Casparino, A., Patsopoulos, N.A., Croteau-Chonka, D.C., Raby, B.A., De Jager, P.L., Sunyaev, S.R., and Cotsapas, C. (2017). Limited statistical evidence for shared genetic effects of eQTLs and autoimmune-disease-associated loci in three major immune-cell types. *Nat Genet* 49, 600–605. <https://doi.org/10.1038/ng.3795>
- [S10] Giambartolomei, C., Vukcevic, D., Schadt, E.E., Franke, L., Hingorani, A.D., Wallace, C., and Plagnol, V. (2014). Bayesian test for colocalisation between pairs of genetic association studies using summary statistics. *PLoS Genet* 10, e1004383. <https://doi.org/10.1371/journal.pgen.1004383>
- [S11] Auton, A., Abecasis, G.R., Altshuler, D.M., Durbin, R.M., Bentley, D.R., Chakravarti, A., Clark, A.G., Donnelly, P., Eichler, E.E., Flicek, P., et al. (2015). A global reference for human genetic variation. *Nature* 526, 68–74. <https://doi.org/10.1038/nature15393>
- [S12] Walter, K., Min, J.L., Huang, J., Crooks, L., Memari, Y., McCarthy, S., Perry, J.R.B., Xu, C., Futema, M., Lawson, D., et al. (2015). The UK10K project identifies rare variants in health and disease. *Nature* 526, 82–89. <https://doi.org/10.1038/nature14962>
- [S13] Chen, M., Raffield, L.M., Mousas, A., Sakaue, S., Huffman, J.E., Moscati, A., Trivedi, B., Jiang, T., Akbari, P., Vuckovic, D., et al. (2020). Trans-ethnic and Ancestry-Specific Blood-Cell

Genetics in 746,667 Individuals from 5 Global Populations. *Cell* 182, 1198-1213.e14.  
<https://doi.org/10.1016/j.cell.2020.06.045>

- [S14] Võsa, U., Claringbould, A., Westra, H.-J., Bonder, M.J., Deelen, P., Zeng, B., Kirsten, H., Saha, A., Kreuzhuber, R., Yazar, S., et al. (2021). Large-scale cis- and trans-eQTL analyses identify thousands of genetic loci and polygenic scores that regulate blood gene expression. *Nat Genet* 53. <https://doi.org/10.1038/s41588-021-00913-z>
- [S15] Lappalainen, T., Sammeth, M., Friedländer, M.R., 'T Hoen, P.A.C., Monlong, J., Rivas, M.A., González-Porta, M., Kurbatova, N., Griebel, T., Ferreira, P.G., et al. (2013). Transcriptome and genome sequencing uncovers functional variation in humans. *Nature* 501, 506–511.  
<https://doi.org/10.1038/nature12531>
- [S16] Kerimov, N., Hayhurst, J.D., Peikova, K., Manning, J.R., Walter, P., Kolberg, L., Samoviča, M., Sakthivel, M.P., Kuzmin, I., Trevanion, S.J., et al. (2021). A compendium of uniformly processed human gene expression and splicing quantitative trait loci. *Nat Genet* 53, 1290–1299.  
<https://doi.org/10.1038/s41588-021-00924-w>
- [S17] Buil, A., Brown, A.A., Lappalainen, T., Viñuela, A., Davies, M.N., Zheng, H.-F., Richards, J.B., Glass, D., Small, K.S., Durbin, R., et al. (2015). Gene-gene and gene-environment interactions detected by transcriptome sequence analysis in twins. *Nat Genet* 47, 88–91.  
<https://doi.org/10.1038/ng.3162>
